# Supplementary material
Source: Springer Nature journal article supplement (https://www.springermedizin.de/resource/supplementary/12950_2005_26_MOESM2_ESM.pdf/9557814)
Supplement: MOESM2 [file 9557814]

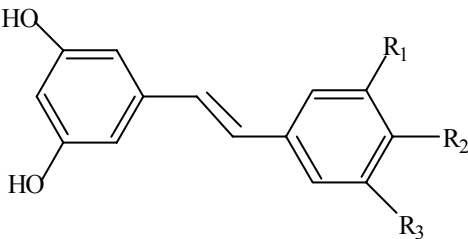

resveratrol

$R_1 = H$

$R_2 = OH$

$R_3 = H$

tetrahydroxymethoxystilbene  $R_1 = OH$

$R_2 = OMe$

$R_3 = OH$

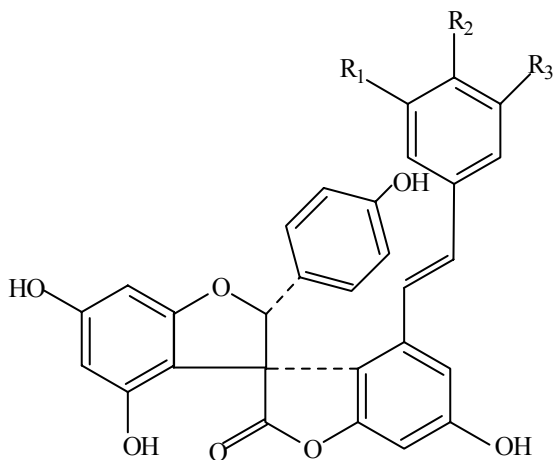

yuccaol A

$R_1 = H$

$R_2 = OH$

$R_3 = H$

yuccaol D

$R_1 = OH$

$R_2 = OMe$

$R_3 = OH$

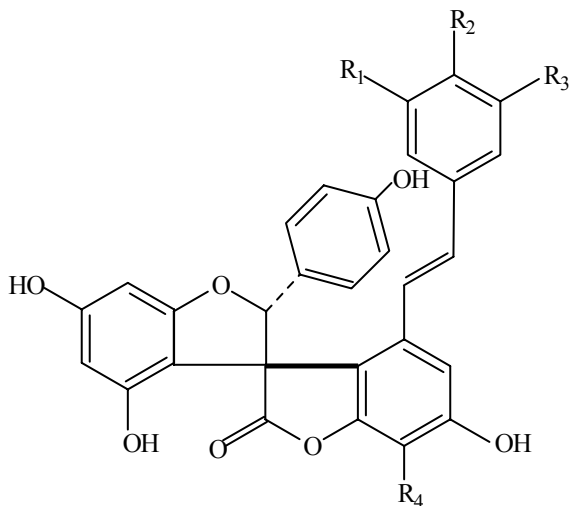

yuccaol B

$R_1 = H$

$R_2 = OH$

$R_3 = H$

$R_4 = H$

yuccaol C

$R_1 = OH$

$R_2 = OMe$

$R_3 = OH$

$R_4 = H$

yuccaol E

$R_1 = OH$

$R_2 = H$

$R_3 = OH$

$R_4 = OMe$
